# Supplementary material for: A study on the clinical characteristics of overweight children in kindergartens in South China
Source: Research Square preprint supplement (doi:10.21203/rs.3.rs-8546522/v1), 2026-02-23
Supplement: Supplementary file 1 [file 1b1d4e98c43acdaa65a164d0.xlsx]

## Sheet: Sheet1
ID	Sex	Age	CAP	E	ALT	GGT	TP	ALB	ALP	LYMPH	HGB	NEUT	RBC	PLT	WBC	weight	height	BMI	体重分类	TC	TG	HDL-C	LDL-C	CREA	Glu
0000510838	2	5	132	4.4	12	12	64.5	43.3	268	2.85	125	4.24	4.52	418	7.73	15	1.093	12.556	0	3.56	0.75	1.40	1.60	34	4.71
0000510985	1	5	162	3.8	15	10	64.3	42.3	209	1.96	125	1.91	4.68	297	4.27	15.8	1.105	12.9399	0	3.72	0.68	1.32	1.95	33	4.07
0000510894	1	5	142	5.2	17	18	65.8	44.7	223	4.19	134	4.51	4.84	411	9.81	16.0	1.103	13.1513	0	4.24	0.87	1.53	1.87	27	5.31
0000510782	2	5	163	4.4	15	11	63.5	44.5	198	2.95	123	2.76	4.17	331	6.51	15.5	1.08	13.2888	0	4.07	1.57	1.32	2.11	26	4.01
0000510836	1	6	202	4.6	16	15	69.5	43.2	181	3.88	128	3.84	4.39	433	8.16	16	1.095	13.3442	0	5.46	0.79	1.42	3.61	32	6.23
0000510594	1	5	189	3.9	16	14	66.6	45.7	339	2.78	126	2.25	4.22	334	5.44	17.2	1.131	13.4463	0	5.13	1.27	2.13	2.20	39	5.48
0000510816	1	6	124	3.8	10	16	65.5	41.6	295	1.95	119	2.95	4.27	329	5.35	18.4	1.169	13.4645	0	4.23	0.46	1.41	2.30	38	4.48
0000510898	1	5	123	4.9	17	14	64.2	42.9	195	2.14	125	6.10	4.46	264	9.29	17.8	1.14	13.6965	0	4.54	0.63	1.87	2.13	26	7.07
0000511014	2	5	184	4	13	15	67.3	42.1	196	2.32	135	4.84	4.73	245	7.99	16.9	1.11	13.7164	0	3.84	0.62	1.27	1.99	31	5.26
0000510875	2	4	185	3.7	9	11	67.7	42.3	243	4.49	120	3.06	4.18	370	8.47	14.6	1.03	13.7619	0	4.50	4.47	0.93	2.64	27	4.97
0000510722	2	4	132	4.7	15	11	68.0	45.7	244	2.23	128	2.02	4.22	180	4.77	17.2	1.115	13.835	0	4.81	0.57	1.68	2.57	33	4.06
0000510903	2	5	121	4.7	14	12	71.3	49.2	176	2.34	125	6.97	4.35	274	9.98	16.3	1.085	13.8461	0	4.92	0.51	1.72	2.61	28	6.78
0000510773	2	5	131	3.4	19	15	70.2	46.5	227	4.25	138	2.61	5.42	284	7.41	16.7	1.098	13.852	0	5.79	0.87	2.70	2.21	38	4.74
0000510963	2	4	165	3.4	11	14	70.7	45.9	204	3.29	126	3.44	4.19	340	7.14	14.5	1.02	13.9369	0	3.88	0.72	1.44	1.86	40	4.94
0000510913	1	6	135	3.7	16	18	68.9	42.2	185	1.76	110	1.90	5.51	427	4.05	16.6	1.091	13.9463	0	4.82	0.58	1.66	2.43	34	5.44
0000510616	1	6	164	3.9	9	10	69.0	44.1	256	3.10	102	3.00	5.21	408	6.71	20.0	1.193	14.0524	0	3.98	0.42	1.73	1.80	37	4.70
0000510764	1	4	100	4.3	13	13	64.4	45.0	227	2.07	128	2.88	4.82	258	5.35	16.7	1.09	14.0561	0	5.08	0.51	1.48	2.96	35	4.96
0000510995	1	5	176	4.8	11	14	64.6	46.5	240	1.57	126	3.32	4.84	394	5.42	19.1	1.165	14.0728	0	3.88	0.66	1.64	1.84	37	4.63
0000510748	1	5	182	3.3	14	16	65.4	44.6	260	2.38	122	2.66	4.45	298	5.61	19.6	1.18	14.0764	0	3.82	0.67	1.65	1.44	29	4.59
0000510832	1	5	139	4.4	17	15	67.9	41.3	262	2.89	125	5.41	4.48	330	8.88	16.1	1.065	14.1947	0	4.25	0.76	1.32	2.27	35	5.26
0000510742	1	5	189	3.4	13	15	67.6	46.1	242	3.52	130	2.22	4.31	220	6.45	20.0	1.186	14.2187	0	4.22	0.60	1.70	1.91	32	4.71
0000510731	1	5	186	4.5	14	13	64.0	44.2	186	3.07	122	2.47	4.10	258	6.32	20.5	1.2	14.2361	0	4.43	0.73	1.88	1.88	31	4.76
0000510687	2	4	167	3.7	13	13	65.8	46.0	294	2.38	127	5.82	4.17	311	8.83	16.3	1.07	14.2371	0	3.63	0.96	1.33	1.59	34	4.77
0000510987	1	4	173	3	15	13	60.9	43.5	240	1.63	128	1.77	4.26	258	3.88	20.2	1.186	14.3609	0	4.61	0.60	1.47	2.44	35	4.72
0000510923	1	5	161	5.2	15	13	71.5	46.3	184	3.27	118	4.02	4.20	233	8.13	20.1	1.18	14.4355	0	3.68	1.10	1.43	1.58	36	4.22
0000510910	1	6	177	6.6	15	15	71.9	44.2	226	2.76	129	5.70	4.61	299	9.45	19.7	1.168	14.4404	0	4.90	0.68	1.38	2.92	38	5.36
0000510925	1	6	176	3.6	13	16	66.7	41.6	178	2.45	132	4.59	4.71	221	7.67	20.1	1.178	14.4846	0	4.11	0.70	1.35	2.27	35	4.74
0000510767	2	4	188	4.8	15	15	68.3	46.2	178	1.49	127	2.67	4.41	298	4.70	16.6	1.07	14.4991	0	4.49	0.82	1.40	2.50	30	4.42
0000510954	2	3	196	4.5	15	13	71.0	49.3	199	2.40	136	9.39	4.85	281	12.82	14.5	1	14.5	0	3.38	0.52	1.53	1.48	35	7.40
0000510681	2	3	169	3.5	16	14	68.9	46.8	236	2.50	110	2.23	5.40	307	5.16	15.1	1.02	14.5136	0	4.49	0.51	1.57	2.37	34	4.66
0000511004	2	5	195	3.7	10	10	66.6	47.2	243	2.53	120	4.85	4.10	234	7.96	17.1	1.085	14.5257	0	4.58	0.74	1.35	2.51	34	4.02
0000510960	1	4	128	4.2	28	15	70.4	48.8	208	2.31	127	4.17	4.54	433	7.18	14	0.98	14.5773	0	4.38	0.58	1.75	2.27	39	4.66
0000510855	1	4	155	3.8	14	12	66.0	40.9	164	2.63	122	3.63	4.34	364	6.97	13.9	0.975	14.622	0	3.60	0.60	1.55	1.49	33	4.97
0000510575	1	5	144	5.4	17	12	66.2	44.2	212	3.08	120	2.43	4.43	348	6.02	19.9	1.166	14.6371	0	3.62	0.45	1.29	1.86	41	4.70
0000510708	1	4	203	4.8	12	18	71.9	49.9	334	3.28	141	1.81	5.33	375	5.64	17.4	1.09	14.6452	0	5.15	0.86	1.98	2.29	34	4.62
0000510611	2	6	149	4.4	44	20	70.6	46.9	259	3.00	131	1.66	4.40	365	5.11	22.0	1.225	14.6606	0	5.50	0.78	1.67	2.93	38	4.56
0000510901	1	4	169	3.3	11	10	68.8	45.0	211	2.44	128	7.02	4.73	311	10.45	19.4	1.15	14.6692	0	4.32	0.61	1.73	2.09	29	6.69
0000510945	1	3	127	3.8	10	12	68.1	41.9	203	3.00	102	3.97	5.34	298	7.83	15.6	1.03	14.7045	0	4.63	0.78	1.50	2.52	37	4.59
0000510911	1	5	132	5.7	18	17	69.3	44.4	239	2.29	125	1.81	4.35	231	5.08	19.3	1.144	14.7471	0	4.10	0.52	1.60	1.98	37	6.48
0000510808	1	5	155	7.9	15	11	62.1	40.7	194	3.10	122	2.46	4.41	292	6.72	19.1	1.138	14.7485	0	4.05	0.51	1.50	2.00	36	4.64
0000510947	1	3	179	4.8	12	10	63.2	45.2	192	1.92	119	2.54	4.20	182	4.98	15.8	1.035	14.7495	0	3.82	0.52	1.36	1.93	35	5.21
0000510823	2	5	169	5.4	10	15	69.3	45.3	205	3.94	129	3.72	4.64	406	8.79	17.7	1.095	14.762	0	4.64	0.69	1.81	2.24	32	4.21
0000510909	2	6	167	6.2	9	9	70.5	44.5	267	1.55	105	1.49	3.78	213	3.54	19.7	1.155	14.7673	0	4.34	0.64	1.80	2.00	39	5.42
0000510587	2	5	162	3	17	14	70.1	44.8	346	2.05	121	2.49	4.46	269	5.56	18.0	1.103	14.7952	0	4.82	0.62	1.83	2.48	38	4.91
0000510766	1	5	151	3.4	13	12	67.0	48.3	178	2.93	125	6.31	4.45	297	9.87	18.4	1.115	14.8002	0	3.61	0.76	1.50	1.55	26	4.53
0000510830	2	5	142	3.2	13	16	65.5	44.7	180	2.79	125	3.96	4.30	428	7.29	17.5	1.087	14.8108	0	5.52	0.61	2.02	2.79	37	4.83
0000511011	1	5	207	3.1	12	12	66.7	45.8	246	1.93	115	1.45	4.04	328	4.14	17.6	1.09	14.8136	0	4.71	1.56	1.93	1.92	25	4.55
0000510770	2	4	140	7	11	15	64.7	45.6	201	3.56	105	2.39	5.36	442	7.23	17.0	1.07	14.8485	0	4.84	0.59	2.07	1.95	29	4.16
0000510821	2	6	176	3	12	15	71.4	47.1	278	2.69	139	2.87	4.74	350	6.33	22.7	1.236	14.859	0	4.88	0.87	1.68	2.60	34	5.05
0000510936	2	6	136	4.2	14	16	68.5	43.4	195	2.14	128	2.53	4.62	299	5.32	21.3	1.197	14.8659	0	4.23	0.46	1.28	2.59	37	4.41
0000510895	1	5	174	3.4	12	14	67.8	46.3	206	4.98	131	3.09	5.11	269	8.74	20.8	1.182	14.8877	0	4.84	0.74	1.48	2.73	37	4.86
0000510812	2	6	189	4	14	13	65.0	44.8	194	3.67	132	3.11	4.69	232	7.24	23.1	1.245	14.903	0	3.14	0.47	1.49	1.27	35	5.15
0000510949	1	4	149	3.4	17	11	64.8	42.8	212	3.61	125	4.18	4.36	227	8.62	16.6	1.055	14.9143	0	4.08	0.51	1.76	1.88	34	4.46
0000510856	2	4	159	4.2	13	13	66.6	43.9	160	3.63	123	5.51	4.25	435	9.84	14.5	0.985	14.945	0	4.00	0.93	1.52	1.86	30	4.46
0000510892	2	5	149	5	12	11	65.2	44.3	223	3.88	122	2.19	4.85	233	6.57	19.1	1.13	14.9581	0	4.21	0.68	1.56	2.05	29	4.06
0000510714	2	3	136	4.7	11	13	63.8	43.0	189	3.84	123	4.13	4.23	285	8.89	16.2	1.04	14.9778	0	4.19	1.26	1.32	2.02	29	4.83
0000510753	2	4	151	3.7	12	12	66.4	46.4	218	3.47	138	2.50	4.66	263	6.52	15.9	1.03	14.9873	0	3.89	0.80	1.49	1.74	27	5.01
0000510712	1	4	203	4.2	17	15	72.5	47.5	795	4.75	138	2.95	4.95	325	8.71	15.6	1.02	14.9942	0	4.49	0.95	1.54	2.40	37	5.55
0000511003	2	5	207	4.3	17	14	67.7	45.4	204	2.14	130	2.24	4.73	291	5.42	19.0	1.125	15.0123	0	3.92	0.87	1.30	2.08	33	3.88
0000510930	1	5	130	2.2	13	15	66.1	47.3	376	2.44	134	2.64	4.77	237	5.44	21.7	1.199	15.0946	0	4.00	0.56	1.55	1.89	40	4.41
0000510938	1	5	113	4.4	12	17	69.4	44.8	234	2.29	130	2.65	4.85	347	5.36	21	1.176	15.1846	0	4.74	1.16	1.52	2.59	26	5.12
0000510699	2	4	148	5	11	16	64.9	41.0	242	3.88	125	4.76	4.52	286	9.20	15.2	1	15.2	0	5.10	1.23	1.57	2.67	34	4.87
0000510633	1	5	128	3.7	16	19	72.0	43.5	197	4.09	128	1.28	4.58	259	6.04	20.9	1.17	15.2677	0	3.94	0.72	1.29	2.07	45	4.49
0000510829	2	6	214	4.2	5	13	66.8	45.3	294	6.32	110	4.25	5.34	379	11.53	20.1	1.147	15.2781	0	5.98	1.09	2.08	3.05	39	4.29
0000510972	1	3	158	3.7	11	12	63.6	40.3	241	3.95	115	3.00	4.35	276	7.72	15.0	0.99	15.3046	0	3.68	0.56	1.55	1.65	37	4.98
0000510871	1	4	136	3.3	18	13	69.1	44.7	320	2.71	124	2.81	4.45	322	6.47	17.2	1.06	15.3079	0	4.18	0.77	1.31	2.28	32	5.00
0000510999	2	4	188	3.7	14	15	70.6	47.9	211	4.16	127	3.88	5.22	447	8.57	17.8	1.078	15.3173	0	4.74	0.94	1.21	2.97	26	3.98
0000510776	1	5	171	4.4	10	11	61.2	44.5	206	3.58	118	1.52	4.36	275	5.91	18.6	1.1	15.3719	0	4.51	0.92	2.12	1.84	37	4.55
0000510998	1	4	165	4	17	12	63.6	42.8	235	3.22	120	2.81	4.79	332	6.50	18.1	1.085	15.3751	0	4.48	0.87	1.19	2.62	29	5.06
0000510674	1	3	215	5.4	29	11	67.0	44.2	215	2.45	120	2.22	4.24	309	5.17	16.8	1.045	15.3843	0	3.40	1.04	1.13	1.58	27	4.44
0000510640	2	5	174	3.6	13	13	70.1	44.0	187	3.09	127	3.70	4.36	308	7.30	21.1	1.171	15.3875	0	5.04	0.76	1.50	2.86	39	4.93
0000510980	2	4	196	5.1	13	15	66.7	43.2	226	3.33	131	2.95	4.85	322	6.90	17.5	1.065	15.429	0	4.98	0.63	1.64	2.90	41	5.04
0000510605	1	6	161	4.3	12	16	70.2	48.0	272	3.08	120	2.76	4.26	375	6.90	23.2	1.226	15.435	0	5.08	0.59	1.53	2.90	31	4.77
0000510961	1	4	165	6.3	14	12	58.9	41.7	326	4.59	118	3.79	4.34	382	9.15	16.4	1.03	15.4586	0	4.18	0.74	1.54	1.99	37	4.62
0000511012	2	5	165	5.6	16	9	68.0	47.6	252	2.43	112	9.18	5.89	349	12.64	17.9	1.075	15.4895	0	4.51	0.51	1.85	2.08	32	2.29
0000510668	1	3	247	6.2	18	10	64.4	44.8	226	4.00	127	1.90	4.67	261	6.19	17.1	1.05	15.5102	0	4.59	0.62	1.81	2.17	42	6.07
0000510916	2	6	169	3.6	13	16	72.3	47.8	276	2.71	144	2.25	4.82	260	5.74	25.1	1.27	15.562	0	9.01	0.57	1.91	5.82	39	5.56
0000510897	1	4	148	2.9	16	11	67.6	45.7	152	2.69	129	5.54	4.50	339	8.96	18.5	1.09	15.5711	0	3.28	0.87	1.26	1.42	29	7.94
0000511009	1	4	143	4.2	10	10	66.5	47.3	173	4.77	119	5.06	4.30	260	10.63	17.5	1.06	15.5749	0	3.79	0.80	1.41	1.77	32	4.41
0000510844	1	4	176	4	10	14	60.7	42.9	137	3.50	120	0.93	4.31	279	4.80	16.5	1.027	15.6438	0	2.60	0.73	0.95	1.19	39	5.24
0000510655	2	3	198	5.8	13	15	67.0	45.5	305	4.59	134	2.92	4.49	322	8.10	15.5	0.995	15.6562	0	5.17	1.30	1.45	3.12	35	6.88
0000510863	2	3	194	4.7	11	10	63.0	42.6	225	3.80	114	2.55	4.01	353	6.89	16.0	1.01	15.6847	0	4.49	0.65	1.75	2.30	32	4.67
0000510621	2	6	166	4.1	12	12	71.5	46.0	246	3.32	123	1.41	4.22	263	5.10	23.8	1.231	15.7058	0	5.44	0.78	2.08	2.47	37	4.77
0000510656	2	3	159	2.7	13	12	67.6	44.7	248	3.30	114	2.77	4.12	279	6.59	16.4	1.02	15.7632	0	5.93	0.97	1.85	3.39	32	4.90
0000510934	1	6	179	3.9	13	18	71.8	45.2	262	4.55	125	2.01	4.59	348	7.68	21.8	1.175	15.79	0	4.68	0.73	1.44	2.65	41	4.59
0000510859	1	3	148	5.3	16	12	64.4	45.7	211	4.21	119	3.90	4.34	232	8.73	15.8	1	15.8	0	4.08	1.09	1.59	1.99	52	4.63
0000510991	1	4	225	5.3	10	12	69.6	45.1	157	3.88	126	1.78	4.64	303	6.28	22.5	1.193	15.8089	0	3.77	0.99	1.56	1.71	30	4.78
0000510685	1	4	150	4.1	10	13	66.8	46.7	135	2.41	109	2.07	3.96	430	4.99	14.3	0.95	15.8449	0	4.30	0.48	1.74	1.98	34	4.71
0000510912	1	6	144	4.4	10	17	65.7	44.7	202	2.03	135	2.25	4.99	305	4.87	22.6	1.194	15.8526	0	4.41	0.54	1.29	2.56	34	6.98
0000510944	1	3	162	5.4	14	12	62.6	44.6	183	3.49	107	1.41	3.94	203	5.32	15.7	0.995	15.8582	0	3.60	0.43	1.88	1.29	42	4.63
0000511005	1	4	178	4.2	14	14	69.5	48.6	201	4.38	130	3.01	4.64	345	7.94	18.4	1.075	15.9221	0	4.25	0.59	1.86	1.98	37	5.03
0000510786	1	6	191	6.3	16	13	66.4	46.4	250	2.87	134	2.83	4.85	340	6.24	21.5	1.16	15.978	0	4.55	0.55	1.58	2.38	38	5.06
0000510676	1	3	145	3.8	12	13	63.0	45.6	189	4.14	129	3.24	4.61	318	8.05	17.8	1.055	15.9925	0	5.21	0.56	2.22	2.46	32	4.85
0000510842	2	5	215	4.6	17	15	67.5	41.7	184	3.15	126	0.93	4.37	200	4.57	21.3	1.154	15.9944	0	4.02	1.56	1.16	2.14	35	7.60
0000510870	2	4	166	4.3	28	16	67.3	41.7	155	4.74	118	2.72	5.91	391	8.34	17.0	1.03	16.0241	0	3.97	1.18	0.84	2.62	33	5.90
0000510896	1	5	205	3.7	20	18	66.3	43.5	192	3.26	130	2.05	4.82	410	5.70	20.5	1.13	16.0545	0	4.80	0.61	1.65	2.56	29	6.94
0000510761	1	4	243	3.1	18	14	66.4	45.4	241	2.70	127	2.78	4.63	312	5.94	20.0	1.115	16.0872	0	3.51	0.55	1.62	1.38	31	5.44
0000510679	1	3	145	3.5	8	7	64.6	43.8	181	2.06	129	2.41	4.78	235	4.86	16	0.995	16.1612	0	3.61	0.97	1.38	1.61	33	4.87
0000510935	1	5	171	3.7	18	15	72.0	47.0	202	3.17	133	4.09	4.74	297	7.89	21.6	1.156	16.1636	0	4.33	0.51	1.45	2.39	34	5.15
0000510841	2	5	160	2.9	12	15	65.4	42.2	200	4.38	117	2.55	4.39	353	7.41	20.67	1.13	16.1876	0	4.48	0.50	1.40	2.47	38	5.25
0000511019	2	3	122	3.8	16	12	65.0	43.7	247	4.51	104	3.38	5.37	307	8.45	19.6	1.1	16.1983	0	6.19	0.57	1.53	3.87	35	4.93
0000511008	1	4	100	3.6	19	13	60.2	41.0	283	2.99	127	4.87	4.95	291	8.50	18.9	1.08	16.2037	0	4.56	0.93	1.95	2.01	33	5.82
0000510618	1	6	153	3	10	12	67.9	44.9	231	3.19	120	1.77	4.80	350	5.66	21.7	1.157	16.2104	0	4.20	0.47	1.80	1.81	41	4.43
0000510920	1	6	184	3	15	16	67.4	46.0	230	2.69	130	2.80	4.78	266	6.25	21.5	1.151	16.2289	0	5.12	0.71	1.61	2.99	36	4.62
0000510771	2	5	166	4.1	14	16	68.0	47.1	244	3.13	141	2.12	4.95	308	5.98	19.5	1.095	16.2632	0	5.90	1.16	1.78	3.13	37	5.17
0000511000	1	4	161	4	15	9	65.4	43.9	140	1.46	114	2.77	4.45	181	4.73	19.9	1.106	16.2683	0	3.67	0.45	2.03	1.17	37	5.86
0000510691	1	4	156	3.6	16	13	62.7	42.0	210	3.40	127	6.05	4.74	333	10.17	20.7	1.125	16.3556	0	2.72	0.77	1.09	1.04	38	4.93
0000510843	1	3	195	4.9	13	12	64.8	42.8	196	3.12	122	4.83	4.29	269	9.96	17.6	1.035	16.4298	0	4.03	0.56	1.61	1.93	36	4.99
0000510787	1	5	203	4.9	16	15	66.5	41.3	250	3.53	139	1.36	4.96	255	5.64	22.3	1.165	16.4306	0	4.52	0.61	1.36	2.56	39	4.23
0000510696	1	4	154	2.8	16	15	63.3	43.3	287	2.67	122	2.14	4.34	275	5.29	21.4	1.14	16.4666	0	3.62	0.51	1.51	1.59	30	4.90
0000511001	1	4	159	3.7	19	15	66.2	44.7	242	2.10	114	5.32	4.14	332	8.06	21.9	1.15	16.5595	1	4.63	1.46	1.18	2.79	28	4.60
0000510988	2	5	175	5.1	11	14	69.3	48.4	164	3.37	132	1.72	4.75	302	5.39	20.1	1.1	16.6116	1	6.47	1.42	1.32	4.54	34	2.90
0000510946	1	4	164	3.6	11	10	61.9	40.5	161	3.39	123	2.60	4.56	263	6.47	18.7	1.06	16.6429	1	3.73	0.51	1.15	2.06	36	4.68
0000510572	1	5	152	4.2	14	15	70.3	48.4	227	2.91	131	2.86	4.54	353	6.46	23.2	1.179	16.6902	1	4.97	0.54	1.86	2.60	41	4.66
0000510941	1	3	197	3.9	19	13	69.3	45.4	247	4.32	123	2.99	4.70	300	8.11	19.2	1.07	16.77	1	4.01	0.51	1.58	2.10	32	4.69
0000510964	2	4	220	5.7	15	13	66.0	44.7	181	2.08	123	1.29	4.66	234	3.62	18.5	1.05	16.78	1	3.92	0.64	1.43	2.00	31	6.02
0000510922	2	5	169	3.5	13	13	70.1	48.3	337	3.54	129	3.91	4.54	352	7.99	22.0	1.145	16.7808	1	4.68	0.63	1.48	2.66	37	4.16
0000510866	2	5	111	3.8	14	11	72.0	46.5	181	2.11	123	3.13	4.55	245	5.96	22.6	1.16	16.7955	1	3.86	0.65	1.91	1.42	37	5.34
0000510851	1	4	111	6	19	12	59.7	43.3	328	2.17	119	4.16	4.23	194	6.71	19.6	1.08	16.8038	1	4.47	0.41	1.77	2.16	34	5.97
0000510620	1	5	171	4.3	18	16	67.5	45.1	259	4.51	133	3.81	4.90	385	9.35	20.0	1.084	17.0205	1	3.33	1.31	1.36	1.09	38	4.55
0000510837	1	6	132	2.7	14	14	64.4	43.0	216	2.91	121	4.01	4.31	299	7.57	26.9	1.257	17.0248	1	3.60	0.52	1.26	1.71	39	5.33
0000510638	2	5	137	4	12	15	63.8	42.7	240	2.36	124	1.84	4.52	279	4.62	23.85	1.182	17.0708	1	4.95	0.56	1.67	2.66	33	5.64
0000510883	1	4	167	3.3	10	16	63.6	43.1	323	3.52	126	4.61	4.94	345	8.83	24.2	1.19	17.0892	1	4.02	0.48	1.66	1.81	34	6.04
0000510617	1	6	155	3.4	10	14	67.7	44.1	161	2.53	114	3.65	3.98	312	6.68	23.2	1.164	17.1231	1	4.19	0.64	1.50	2.10	39	4.74
0000510973	1	3	177	3.7	14	14	68.3	45.8	217	5.26	120	3.47	4.38	271	9.55	18.7	1.045	17.1242	1	4.23	1.24	1.54	1.87	34	5.48
0000510716	2	3	136	2.6	15	13	64.5	44.1	232	3.32	108	2.32	5.71	358	6.45	17.3	1.005	17.1283	1	4.38	0.49	1.79	2.07	34	4.26
0000510976	1	3	195	4.2	16	10	66.4	43.5	177	2.43	122	1.41	4.76	169	4.44	18.4	1.03	17.3438	1	3.47	0.40	1.21	1.87	30	5.37
0000510984	1	4	188	3.9	10	10	57.7	42.1	168	2.59	119	2.23	4.44	194	5.23	21.4	1.11	17.3687	1	2.62	0.63	1.16	0.99	35	4.79
0000510740	1	5	186	3.4	15	12	71.1	44.0	264	2.73	132	2.75	4.81	244	6.35	23.8	1.165	17.5358	1	3.44	1.60	0.83	1.98	40	4.06
0000510833	1	6	169	2.9	14	14	67.9	42.7	200	4.15	123	2.53	4.52	348	7.15	22.5	1.131	17.5897	1	4.96	1.28	1.59	2.80	44	7.24
0000510826	1	5	162	4	10	13	68.6	46.1	211	2.77	134	4.85	4.70	362	8.46	22.7	1.127	17.8722	1	3.84	0.87	1.29	1.89	36	4.74
0000510860	1	3	189	4.4	15	21	69.2	45.9	209	5.52	121	2.70	4.28	281	8.63	15.7	0.935	17.9588	1	6.20	0.81	1.73	3.75	40	4.58
0000510959	1	3	168	3.3	12	13	61.2	42.4	206	3.12	125	3.54	4.49	285	7.21	18.2	1.005	18.0194	1	4.11	0.85	1.50	2.09	34	5.06
0000510952	2	3	241	2.9	11	12	59.7	43.5	288	2.27	113	1.51	3.86	207	4.07	19.7	1.045	18.0399	1	3.89	0.75	1.58	1.50	34	4.70
0000510698	2	4	131	3	14	15	61.5	45.3	216	1.74	120	4.82	4.15	310	7.33	19.7	1.045	18.0399	1	4.30	0.61	1.18	2.46	32	4.24
0000510918	2	5	149	4.6	17	11	64.4	43.3	193	2.99	123	1.70	4.57	144	5.43	23.3	1.136	18.0551	1	3.40	0.76	0.88	2.07	40	5.09
0000511007	1	4	162	3.1	15	12	59.6	41.2	254	3.91	130	2.00	4.79	336	6.34	23.9	1.15	18.0718	1	3.71	0.51	1.34	1.75	33	4.65
0000510917	2	5	180	5.2	18	18	71.6	45.5	183	2.53	134	1.97	4.70	309	4.87	29.2	1.191	20.5854	1	3.24	1.06	0.94	1.69	33	4.38
0000510929	1	6	194	4.7	17	14	66.8	43.2	275	1.33	128	5.04	4.36	224	7.48	32.2	1.239	20.9755	1	3.59	0.62	1.54	1.44	35	4.91
0000510828	1	5	160	3.1	16	19	73.0	48.4	250	4.27	140	4.84	4.91	325	10.08	34.2	1.231	22.5689	1	4.28	0.55	1.69	2.10	47	4.61

## Sheet: 工作表1
姓名	姓名
丁羿	丁羿
丁锦官	丁锦官
上官沐禾	上官沐禾
王成蹊	王成蹊
王聿铭	王聿铭
王思懿	王思懿
王祎可	王祎可
王梓铭	王梓铭
王晴央	王晴央
王熠衡	王熠衡
卢科晔	卢科晔
卢静渊	卢静渊
平衡	平衡
白芷睿	白芷睿
邓佩玘	邓佩玘
邓承宇	邓承宇
龙泽茗	龙泽茗
任天皓	任天皓
刘长天	刘长天
刘安哲	刘安哲
刘佳和	刘佳和
刘昀希	刘昀希
刘润佳	刘润佳
刘清铧	刘清铧
孙启皓	孙启皓
孙朗	孙朗
孙敏瑞	孙敏瑞
孙楚航	孙楚航
朱子川	朱子川
朱子南	朱子南
许书晏	许书晏
许怀瑾	许怀瑾
许知远	许知远
许敬宇	许敬宇
何聿昕	何聿昕
何羿琛	何羿琛
何霈	何霈
余沛珈	余沛珈
余沛峰	余沛峰
余佳音	余佳音
吴子宁	吴子宁
吴泽熙	吴泽熙
吴萧予	吴萧予
应明哲	应明哲
张子和	张子和
张艺馨	张艺馨
张佳凝	张佳凝
张知行	张知行
张连馨	张连馨
张梓望	张梓望
张景珵	张景珵
李玉彤	李玉彤
李宇轩	李宇轩
李卓伦	李卓伦
李芯凝	李芯凝
李诗淼	李诗淼
李雨恒	李雨恒
李梓琦	李梓琦
李维桉	李维桉
李静初	李静初
杜仲桓	杜仲桓
杨安然	杨安然
杨羽晴	杨羽晴
杨翼广	杨翼广
沈弘毅	沈弘毅
肖载元	肖载元
肖皓荣	肖皓荣
肖穆熙	肖穆熙
谷月晞	谷月晞
周其原	周其原
周程宁	周程宁
林元策	林元策
林晨玥	林晨玥
陈子阳	陈子阳
陈云朵	陈云朵
陈行之	陈行之
陈俊廷	陈俊廷
陈奕彤	陈奕彤
陈奕添	陈奕添
陈彦彤	陈彦彤
陈柏乔	陈柏乔
陈祈谚	陈祈谚
陈禹霏	陈禹霏
陈诺	陈诺
陈熙悦	陈熙悦
勇森宝	勇森宝
封予洵	封予洵
胡奕锴	胡奕锴
胡郅晟	胡郅晟
胡峻宇	胡峻宇
胡颢廷	胡颢廷
贺颂言	贺颂言
赵一舟	赵一舟
赵子骅	赵子骅
郑子柠	郑子柠
郑子榛	郑子榛
郑安辰	郑安辰
郑昀昊	郑昀昊
钟佳行	钟佳行
钟蔓宁	钟蔓宁
唐格尔	唐格尔
殷铭瀚	苏羽辰
苏羽辰	苏璟若
苏璟若	酒梓月
酒梓月	高天晴
高天晴	高瑜成
高瑜成	崔译兴
崔译兴	梁伊潼
梁伊潼	郭文霄
郭文霄	郭宇昊
郭宇昊	郭曦泽
郭曦泽	黄书筠
黄书筠	黄宇曦
黄宇曦	黄妍
黄妍	黄诗雅
黄诗雅	黄溯
黄溯	黄靖熙
黄靖熙	黄睿源
黄睿源	傅品棋
傅品棋	温沈宁
温沈宁	覃景珩
覃景珩	韩可心
韩可心	韩家乐
韩家乐	葛之宜
葛之宜	董默文
董默文	解蕴涵
解蕴涵	赖以畅
赖以畅	赖以耿
赖以耿	赖羽樱
赖羽樱	熊子乐
熊子乐	谭晞恒
谭晞恒	谭楚辰
谭楚辰	潘诺恒
潘诺恒	潘湉宓
潘湉宓	蒋君坦
蒋君坦	蒋锦城
蒋锦城	蔡飞羽
蔡飞羽	蔡壬杰
蔡壬杰	蔡佳铄
蔡佳铄	黎皓源
黎皓源
